# Supplementary material
Source: PubMed Central journal article supplement (PMC4588620)
Supplement: EC.00096-15_zek999094477so1.pdf [file EC.00096-15_zek999094477so1.pdf]

1 **Supplement**

2 **TABLE S1** Plasmids used in this work.

| <b>Plasmid</b> | <b>Characteristics</b>                                                     | <b>Reference</b>                  |
|----------------|----------------------------------------------------------------------------|-----------------------------------|
| pDrive         | Cloning vector                                                             | Qiagen, Germany                   |
| 13K19          | pBeloBAC11 with DNA of chromosome 17 including Cre17.g698750               | CUGI, Clemson University, USA (1) |
| 31O13          | pBeloBAC11 with DNA of chromosome 10 including <i>RAA8</i> (Cre10.g440000) | CUGI, Clemson University, USA (1) |
| 31O13-1        | Ligation of 36 kb derived from 31O13: <i>Sgsl</i>                          | This work                         |
| 31O13-2        | Ligation of 48 kb derived from 31O13: <i>Sgsl</i>                          | This work                         |
| 31O13-3        | Ligation of 34 kb derived from 31O13: <i>BlnI</i>                          | This work                         |
| 31O13-4        | Ligation of 36 kb derived from 31O13: <i>BlnI</i>                          | This work                         |
| 31O13-5        | Ligation of 31O13: <i>SfuI</i> , <i>Clal</i>                               | This work                         |
| 31O13-6        | Subcloned DNA of <i>RAA8</i> , Cre10.g440050                               | This work                         |
| 31O13-7        | Subcloned DNA of <i>RAA8</i>                                               | This work                         |
| pDrive_PCR250B | 0.70 kb DNA of <i>RAA8</i> in pDrive                                       | This work                         |
| pDrive_PCR252A | 1.45 kb DNA of <i>RAA8</i> in pDrive                                       | This work                         |
| pDrive_PCR253  | 0.80 kb DNA of <i>RAA8</i> in pDrive                                       | This work                         |
| pDrive_PCR256B | 1.28 kb DNA of <i>RAA8</i> in pDrive                                       | This work                         |
| pIG637.1       | 0.9 kb <i>BglII</i> / <i>NsiI</i> fragment for <i>tscA</i> probes          | (2, 3)                            |

|  |                      |  |
|--|----------------------|--|
|  | in Northern analyses |  |
|--|----------------------|--|

3

4

5 **TABLE S2** Oligonucleotides used in PCR, RT-PCR or hybridization experiments.

| Oligonucleotide                       | Sequence (5' → 3')  | Application, reference               |
|---------------------------------------|---------------------|--------------------------------------|
| Cloning and sequencing of <i>RAA8</i> |                     |                                      |
| for_IP2_Ex2-2                         | CAGTTGGTGCGGGTGTTGG | Specific for <i>RAA8</i> , this work |
| rev_IP2_Ex3                           | CTCAATGGCAGCGAGACCT | Specific for <i>RAA8</i> , this work |
| rev_raa8-F1-2                         | GCCCTTCCTGTACATAACC | Specific for <i>RAA8</i> , this work |
| for-2-IP2_Ex3                         | GCTGGCGGCGCTGTCACAC | Specific for <i>RAA8</i> , this work |
| rev_IP2_Ex4                           | TCGGGCTGGTAGCCCAGAC | Specific for <i>RAA8</i> , this work |
| for_raa8_F1                           | CTGGCATGCTCAGGGTCGC | Specific for <i>RAA8</i> , this work |
| rev_raa8_F1.1                         | AGCCGTCTGTGAAGGTTTG | Specific for <i>RAA8</i> , this work |
| for_raa8-F2-7                         | GACACACCGCAGGAGTTG  | Specific for <i>RAA8</i> , this work |
| raa8_F3-for                           | TAGCATGGAGTGGCTACAG | Specific for <i>RAA8</i> , this work |
| rev_raa8-F2-4                         | TGCGGACCTCGCACTGAAG | Specific for <i>RAA8</i> , this work |
| for-raa8-F6-3                         | GGGCTACCAGCCCGAGGAC | Specific for <i>RAA8</i> , this work |
| for-raa8-Ex2-3                        | CGGCTGCTTACAAACCTTC | Specific for <i>RAA8</i> , this work |
| for_Raa8_Mutati<br>on                 | TTGGCGGCGGCAGGTGTAG | Specific for <i>RAA8</i> , this work |
| rev_Raa8_Mutati<br>on                 | TTTGCGCTTTCGCATGGG  | Specific for <i>RAA8</i> , this work |
| rev-raa8-F6-4                         | ACTTCTTGCTTGCGCATCC | Specific for <i>RAA8</i> , this work |
| raa8-F2-for                           | GCAGGCGGTTATGTACAGG | Specific for <i>RAA8</i> , this work |
| rev-raa8-F2-4                         | TGCGGACCTCGCACTGAAG | Specific for <i>RAA8</i> , this work |
| for-raa8-F2-5                         | GGCGCTGCTTCAGTGCGAG | Specific for <i>RAA8</i> , this work |

|                 |                                   |                                      |
|-----------------|-----------------------------------|--------------------------------------|
| rev-raa8-F2-6   | AACTCCTGCGGTGTGTCC                | Specific for <i>RAA8</i> , this work |
| for-raa8-F6-4   | GATGCGCAAGCAAGAAGTG               | Specific for <i>RAA8</i> , this work |
| rev_ raa8-F5-2  | GTTGTGCATCGCTATCTC                | Specific for <i>RAA8</i> , this work |
| for-raa8-F2-3   | GAGATAGCGATGCACAAC                | Specific for <i>RAA8</i> , this work |
| rev-raa8-F6-2   | GTCCACACGCCGGGCCTTG               | Specific for <i>RAA8</i> , this work |
| for-raa8-F6     | TGCCGTGCAGGCATGCAG                | Specific for <i>RAA8</i> , this work |
| rev-raa8-F6-3   | TGACACGCCAACATGCTC                | Specific for <i>RAA8</i> , this work |
| for-raa8-F6-2   | CAAGGCCCGGCGTGTGGAC               | Specific for <i>RAA8</i> , this work |
| rev_IP2_Ex7     | GGTCTGCCTGCTGCTCCTC               | Specific for <i>RAA8</i> , this work |
| for-raa8-F7     | AGCATGTTGGCGTGTGTCAG              | Specific for <i>RAA8</i> , this work |
| rev_IP2-Ex8     | CTGCAGCGCCAGCACCCAG               | Specific for <i>RAA8</i> , this work |
| rev-raa8-F8     | CGTGTGGTTGTGCATGTG                | Specific for <i>RAA8</i> , this work |
| for-raa8-F9     | ACGAACTCGCACACGTTG                | Specific for <i>RAA8</i> , this work |
| rev_IP2_Ex9     | ACGGAGGCACCAGCTTGTC               | Specific for <i>RAA8</i> , this work |
| RT-PCR analyses |                                   |                                      |
| for_psaAEx1     | AGTACTCCAGAGCGCGAAG<br>C          | RT-PCR of <i>psaA</i> (4)            |
| for_psaAEx2     | TTGGAACCTTCACGCAGAT<br>G          | RT-PCR of <i>psaA</i> (4)            |
| Oligo 19        | TTGGTTAAGTGACCCTACTC<br>A         | RT-PCR of <i>psaA</i> (4)            |
| Oligo 50        | GTATTCAGTGCACACTTTGG<br>TCAATTAGG | RT-PCR of <i>psaA</i> (4)            |

|          |                            |                                               |
|----------|----------------------------|-----------------------------------------------|
| Oligo 53 | AAAAGTAAAGATTGCGGTTG<br>AT | RT-PCR of <i>psaA</i> , Northern analysis (4) |
|----------|----------------------------|-----------------------------------------------|

6

7

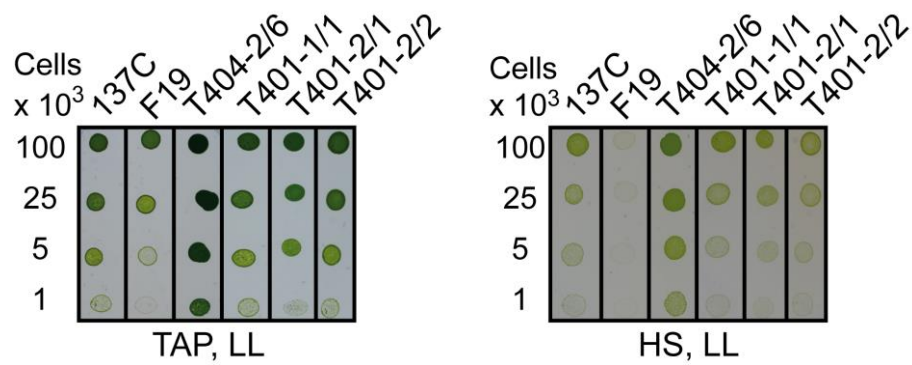

8

9 **FIG S1 Functional complementation of *trans*-splicing mutant F19.** Test for

10 photoautotrophic growth of wild type 137C, *trans*-splicing mutant F19, and selected

11 transformants. Cells were spread onto acetate containing (TAP) or acetate lacking (HS)

12 agar plates at cell densities as indicated and incubated under low light (LL).

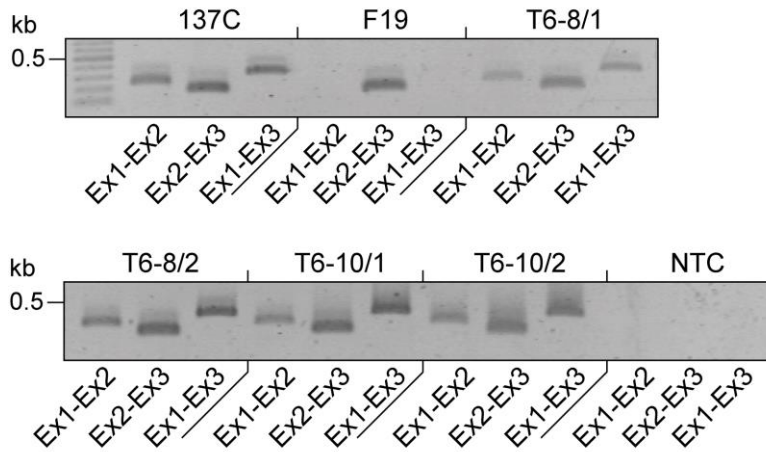

13

14 **FIG S2 Molecular characterization of F19 and complemented strains.** PCR analysis

15 using cDNA of 137C, F19, two transformants derived from transformation with 31O13-6

16 (T6-8/1, -8/2), and two transformants of 31O13-7 (T6-10/1, -10/2). Different primer

17 combinations were used to amplify *psaA* exon 1 - exon 2, exon 2 - exon 3, and exon 1 -

18 exon 3.

19





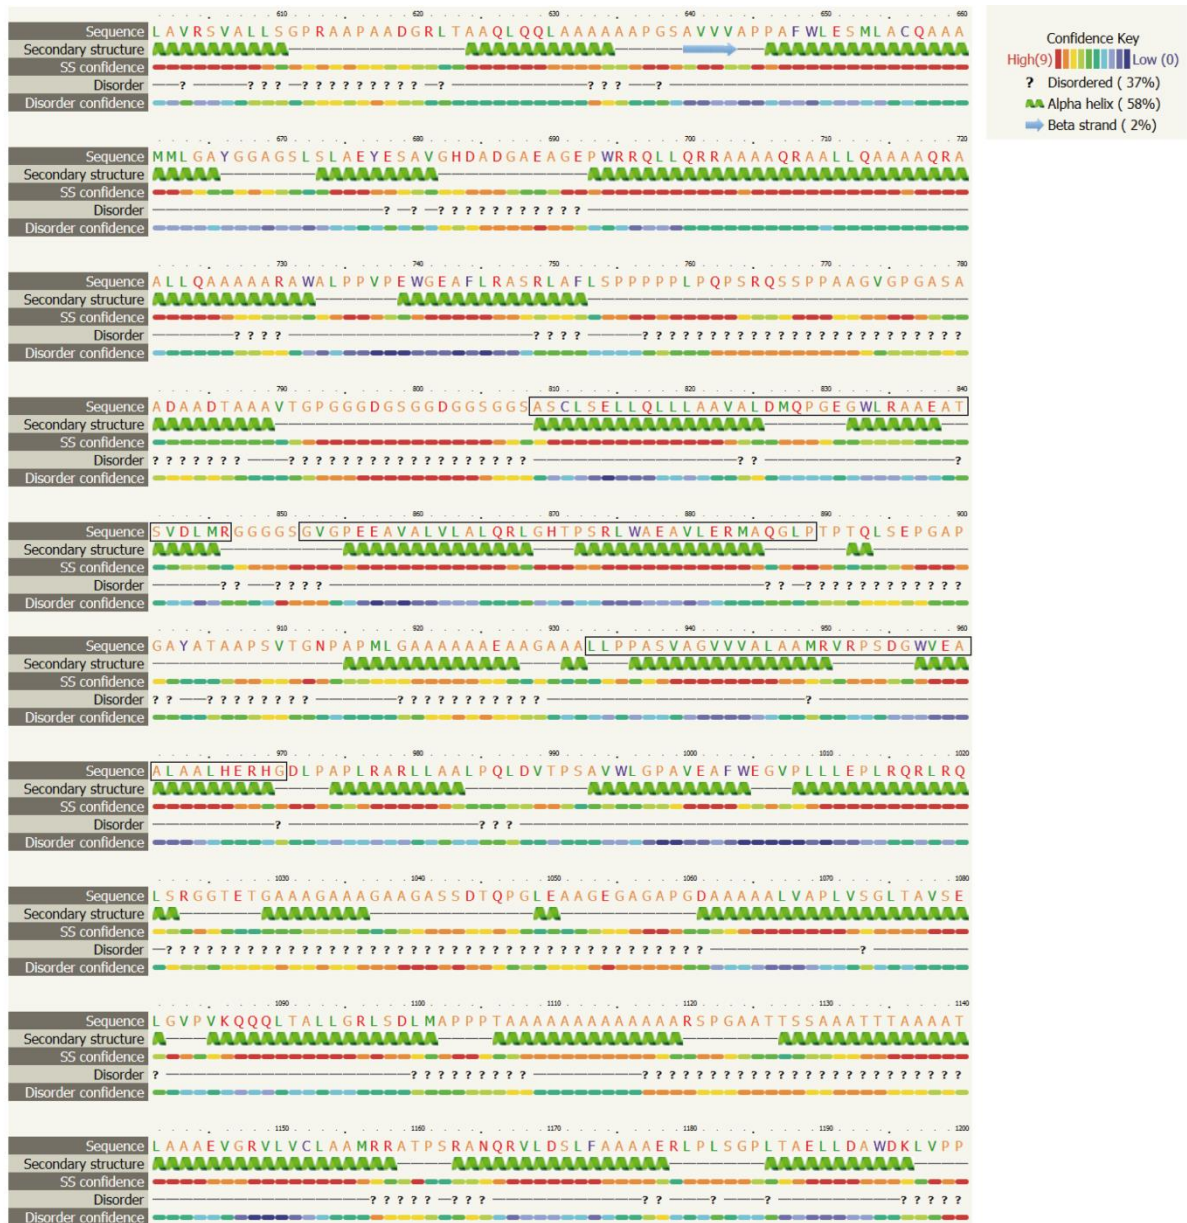

22  
 23 **FIG S3 Secondary structure prediction of a partial Raa8 sequence (from A1,546 to**  
 24 **P2,745).** Prediction of  $\alpha$ -helices (green),  $\beta$ -strands (blue arrows), and coil regions (faint  
 25 lines) by the program Phyre<sup>2</sup> (5). Scale of confidence key is given in highest (9, red) to  
 26 lowest (0, blue). Predicted OPR repeats are marked as black boxes. Residues were  
 27 coloured according to a property based scheme (A,S,T,G,P small/polar; M,I,L,V  
 28 hydrophobic; K,R,E,N,D,H,Q charged; W,Y,F,C aromatic/cysteine). Question marks  
 29 indicate the prediction of disordered regions.

30 Supplemental references

- 31 1. **Kim UJ, Birren BW, Slepak T, Mancino V, Boysen C, Kang HL, Simon MI,**  
32 **Shizuya H.** 1996. Construction and characterization of a human bacterial artificial  
33 chromosome library. *Genomics* **34**:213-218.
- 34 2. **Herdenberger F, Holländer V, Kück U.** 1994. Correct *in vivo* RNA splicing of a  
35 mitochondrial intron in algal chloroplasts. *Nucleic Acids Res* **22**:2869-2875.
- 36 3. **Holländer V, Kück U.** 1998. Splicing of the mitochondrial group II intron *r1*:  
37 conserved intron-exon interactions diminish splicing efficiency. *Curr Genet* **33**:117-  
38 123.
- 39 4. **Glanz S, Jacobs J, Kock V, Mishra A, Kück U.** 2012. Raa4 is a *trans*-splicing  
40 factor that specifically binds chloroplast *tscA* intron RNA. *Plant J* **69**:421-431.
- 41 5. **Kelley LA, Sternberg MJ.** 2009. Protein structure prediction on the Web: a case  
42 study using the Phyre server. *Nat Prot* **4**:363-371.
